# Supplementary material for: Deep Neural Networks Training by Stochastic Quasi-Newton Trust-Region Methods
Source: MDPI journal article supplement (doi:10.3390/a16100490), 2023-10-20
Supplement: s1 [file s1]

# Supplementary Materials: Deep Neural Networks Training by Stochastic Quasi-Newton Trust-Region Methods

Mahsa Yousefi<sup>1</sup>  and Ángeles Martínez<sup>1,\*</sup> 

## 1. Additional Experiments

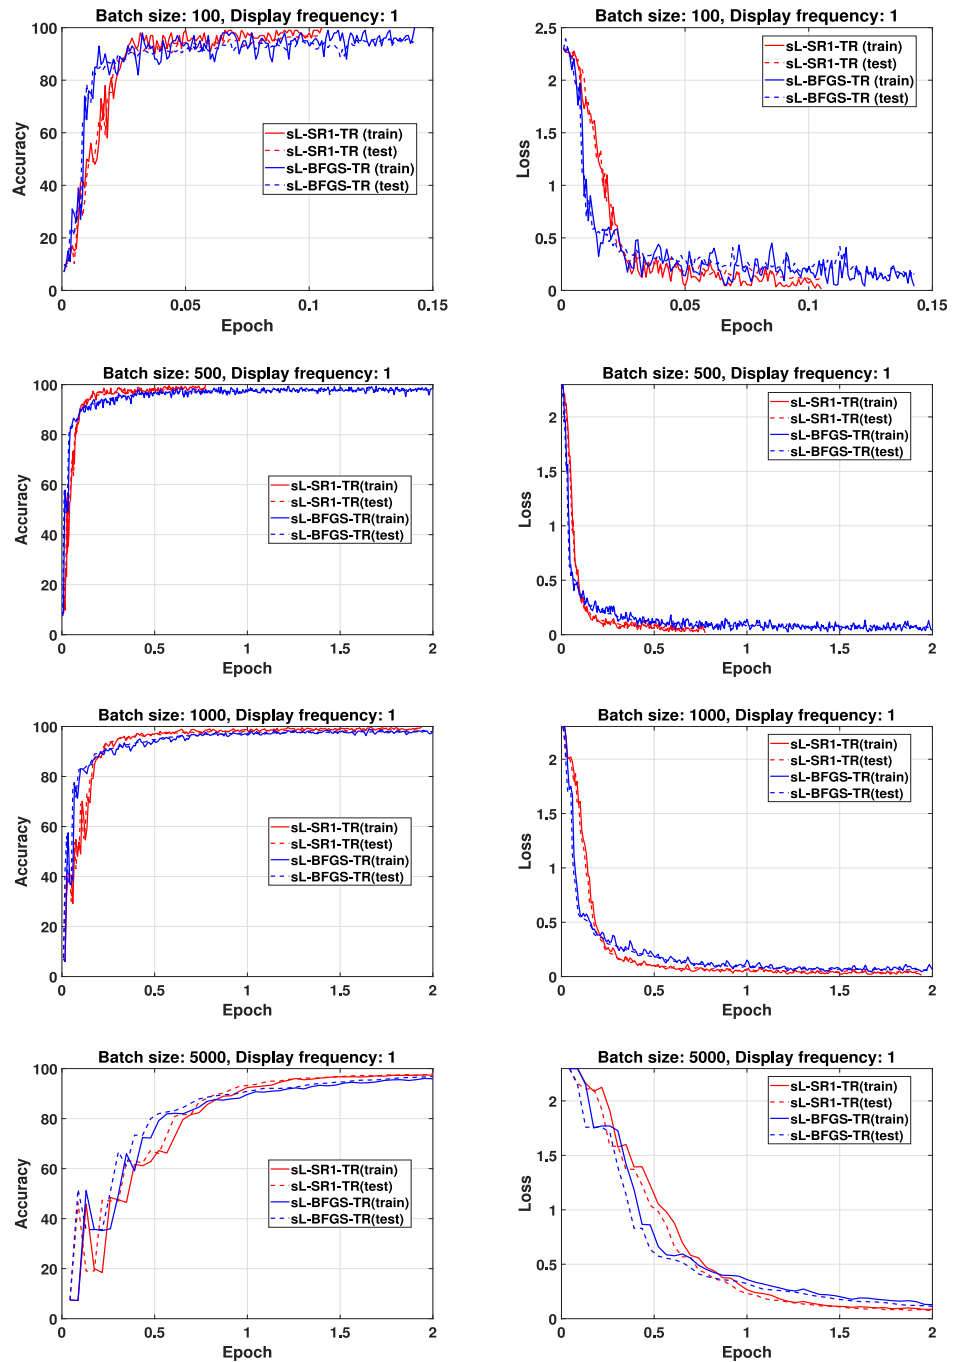

Figure S1. MNIST, LeNet-like: The accuracy and loss evolution vs epoch.

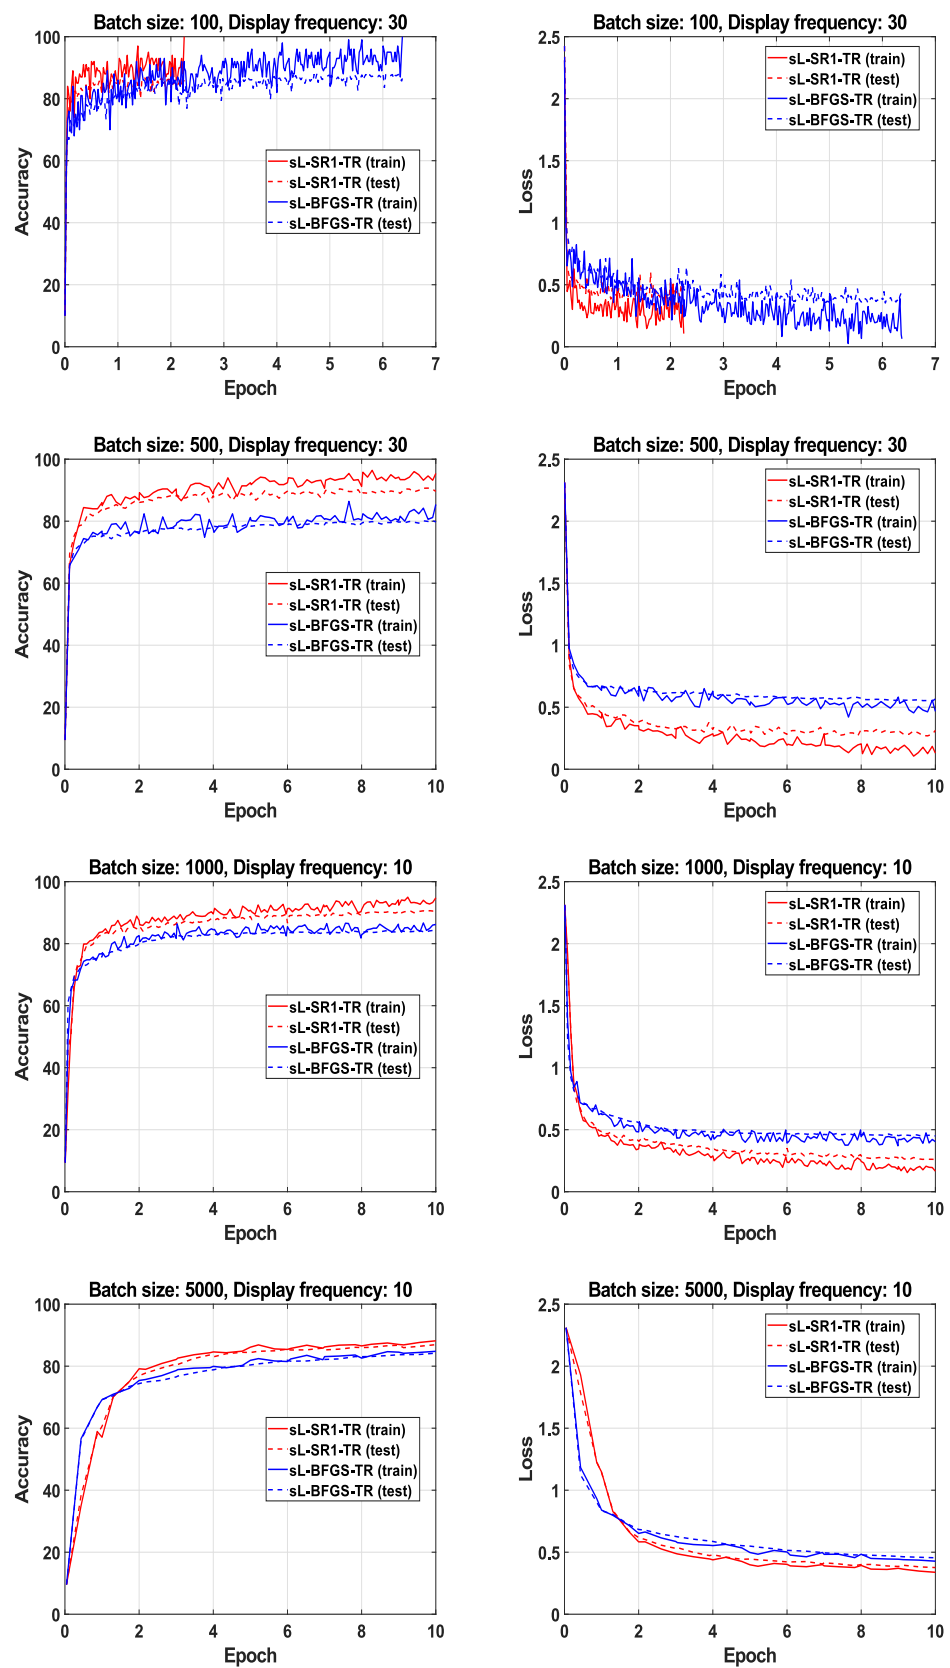

Figure S2. F-MNIST, LeNet-like: The accuracy and loss evolution vs epoch.

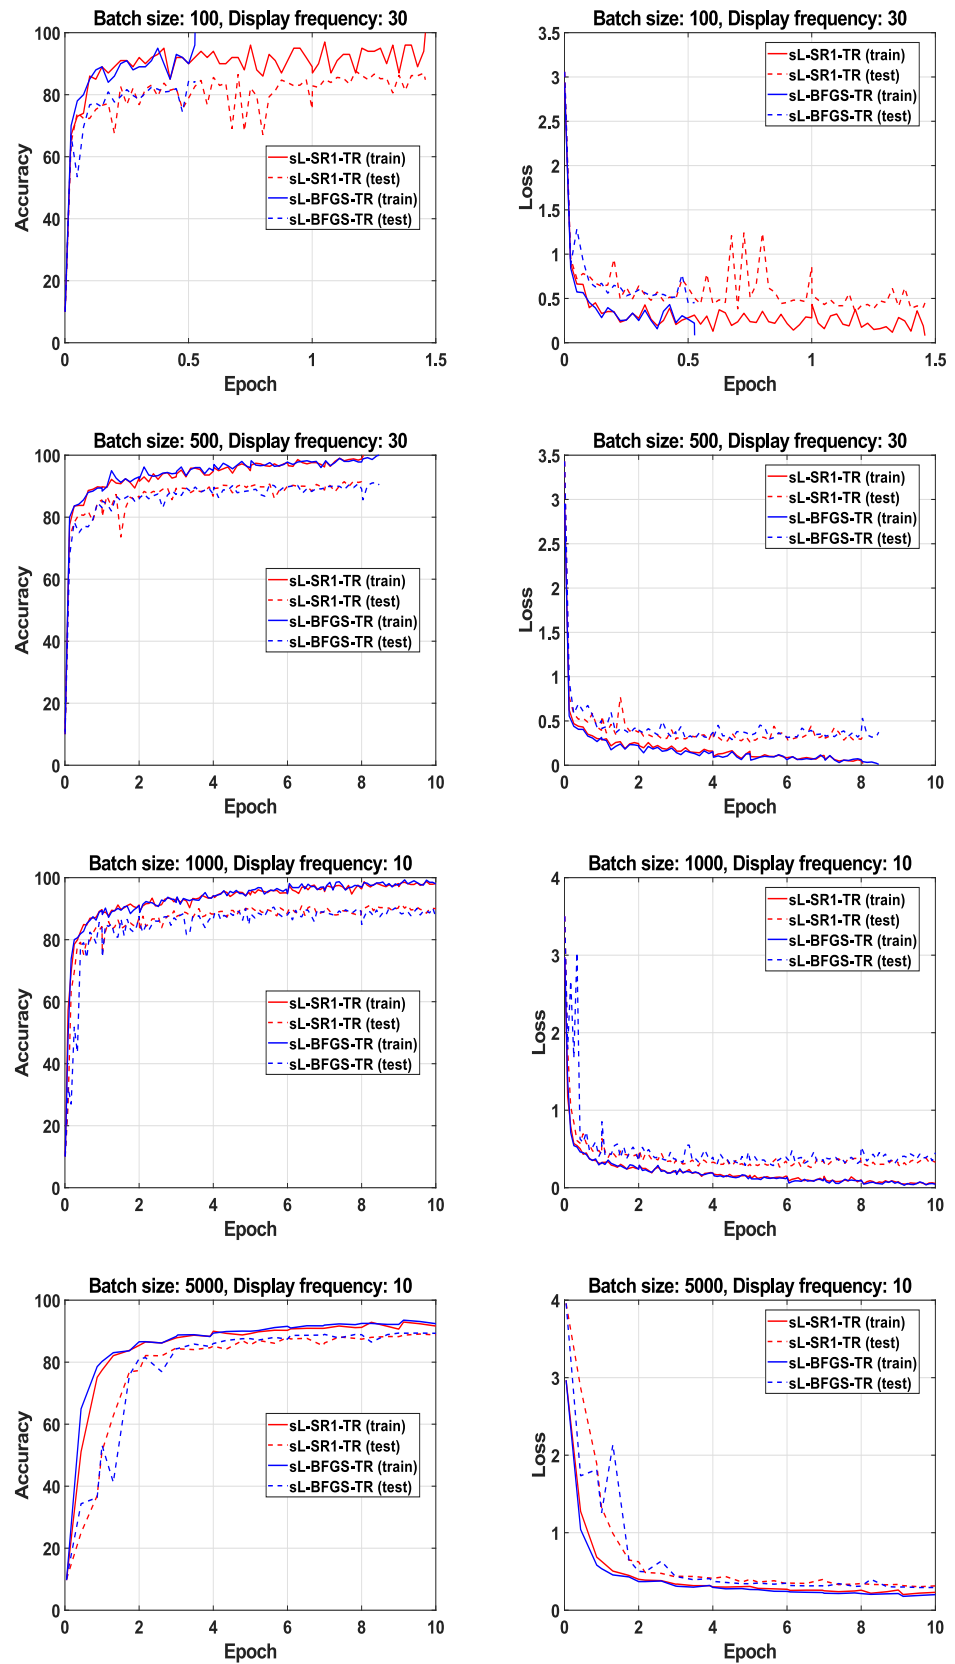

Figure S3. F-MNIST, ResNet-20: The accuracy and loss evolution vs epoch.

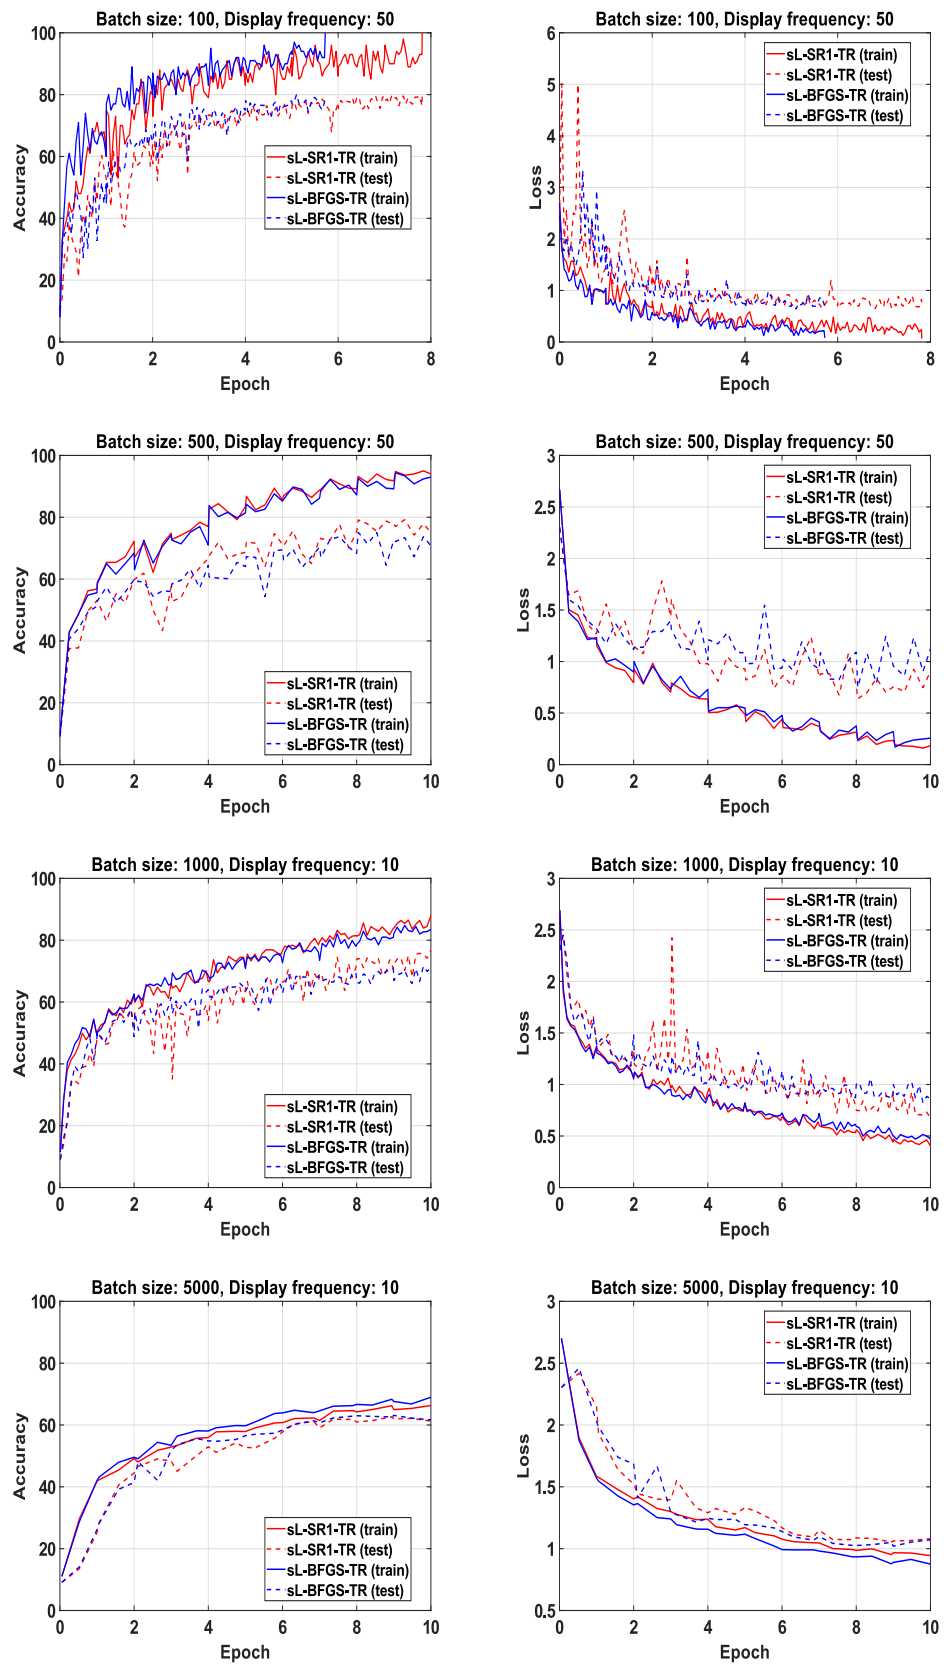

Figure S4. CIFAR10, ResNet-20: The accuracy and loss evolution vs epoch.



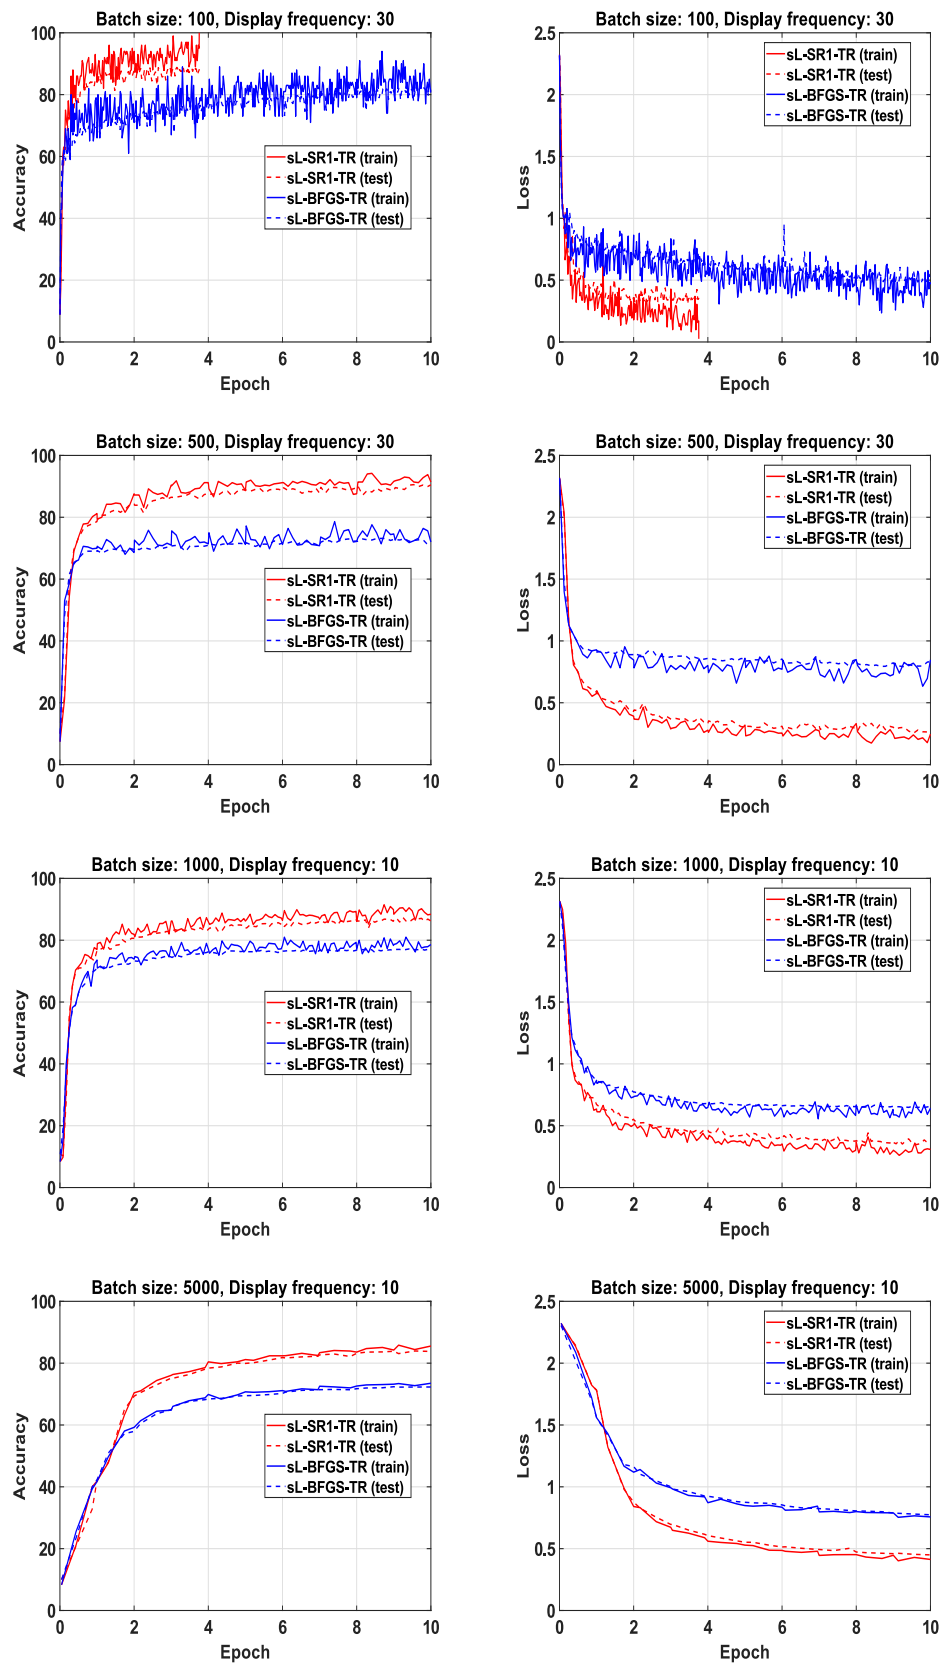

Figure S5. F-MNIST, ResNet-20 (No BN): The accuracy and loss evolution vs epoch.

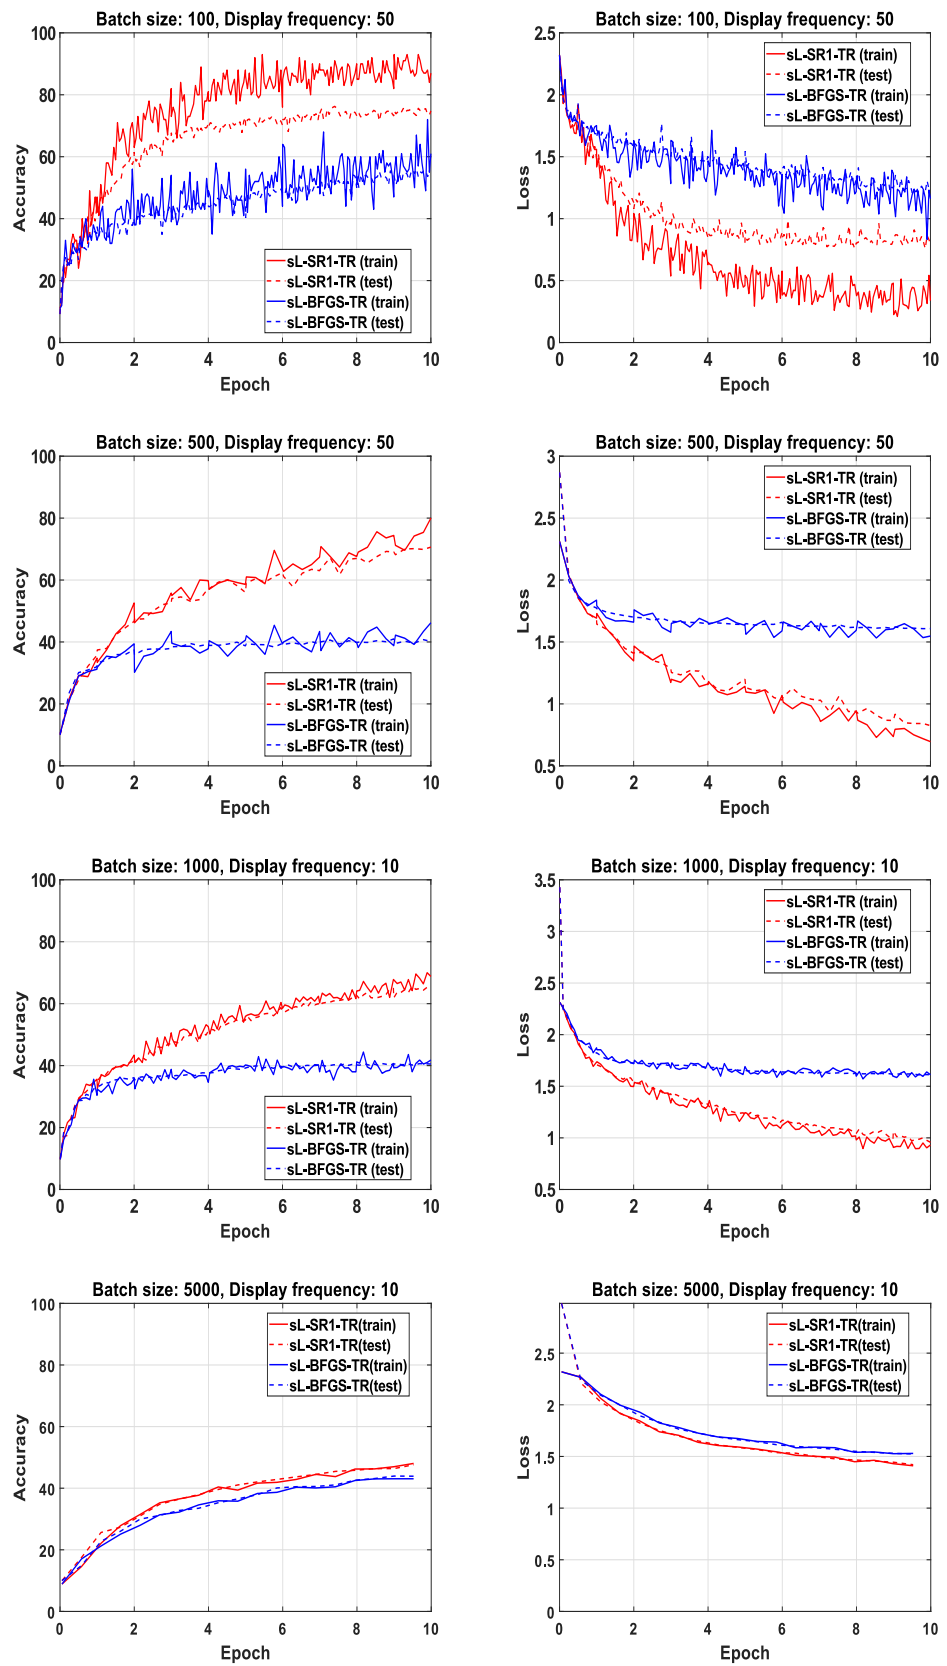

**Figure S6.** CIFAR10, ResNet-20 (No BN): The accuracy and loss evolution vs epoch.

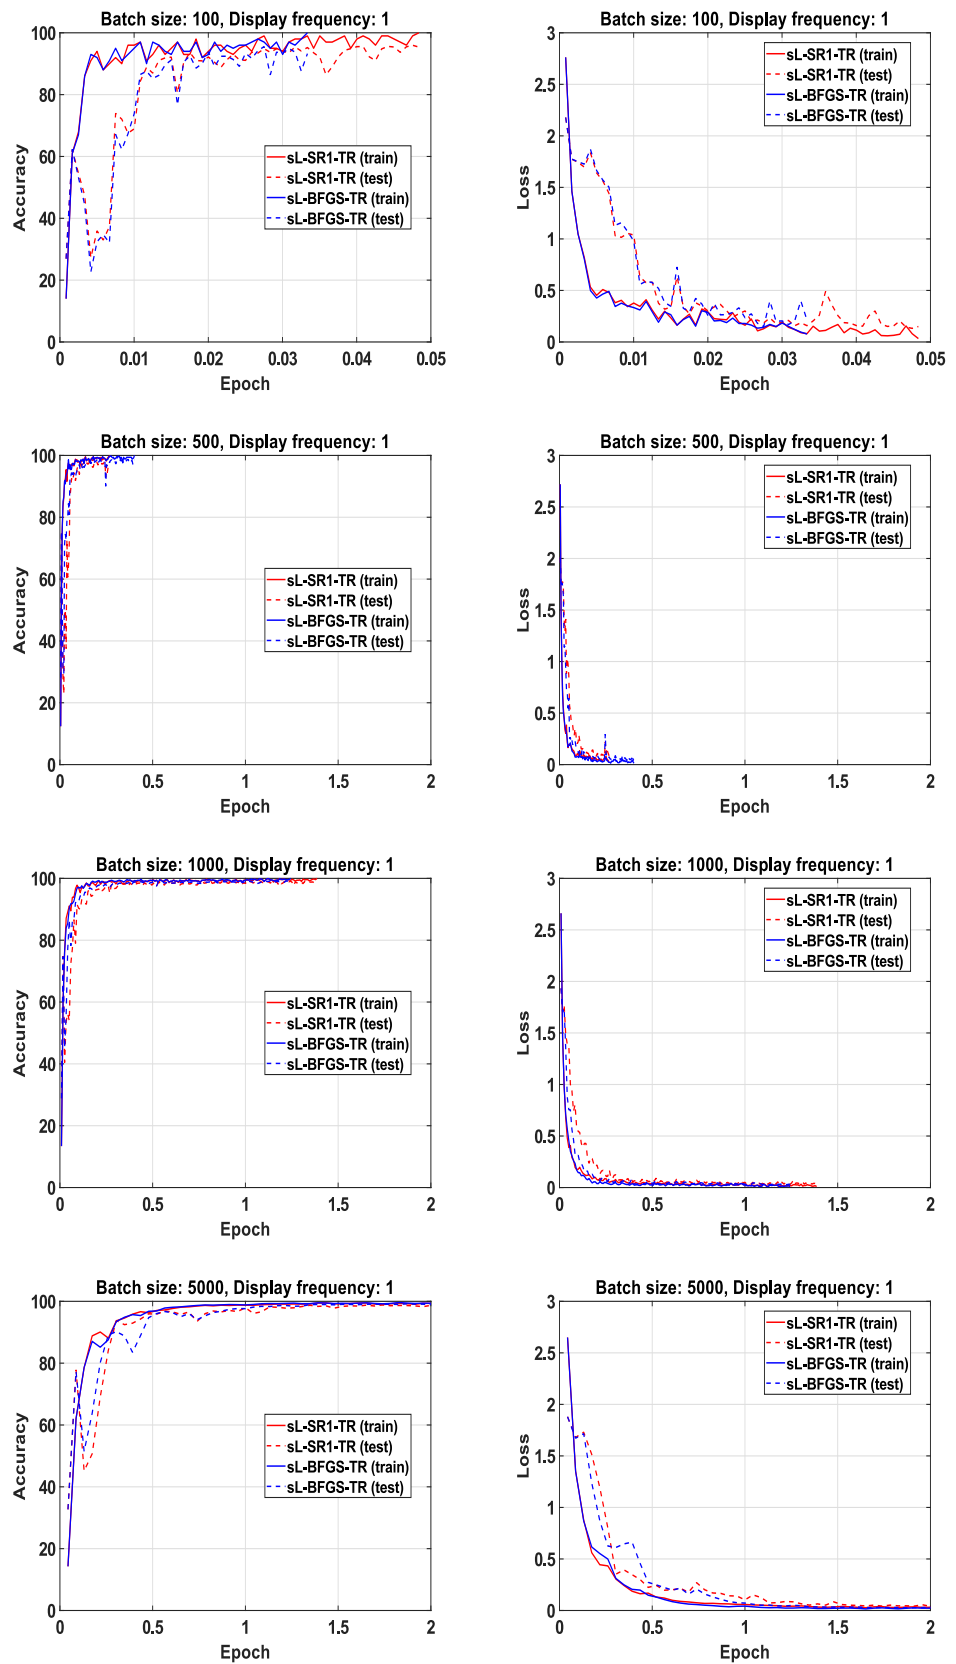

Figure S7. MNIST, ConvNet3FC2: The accuracy and loss evolution vs epoch.

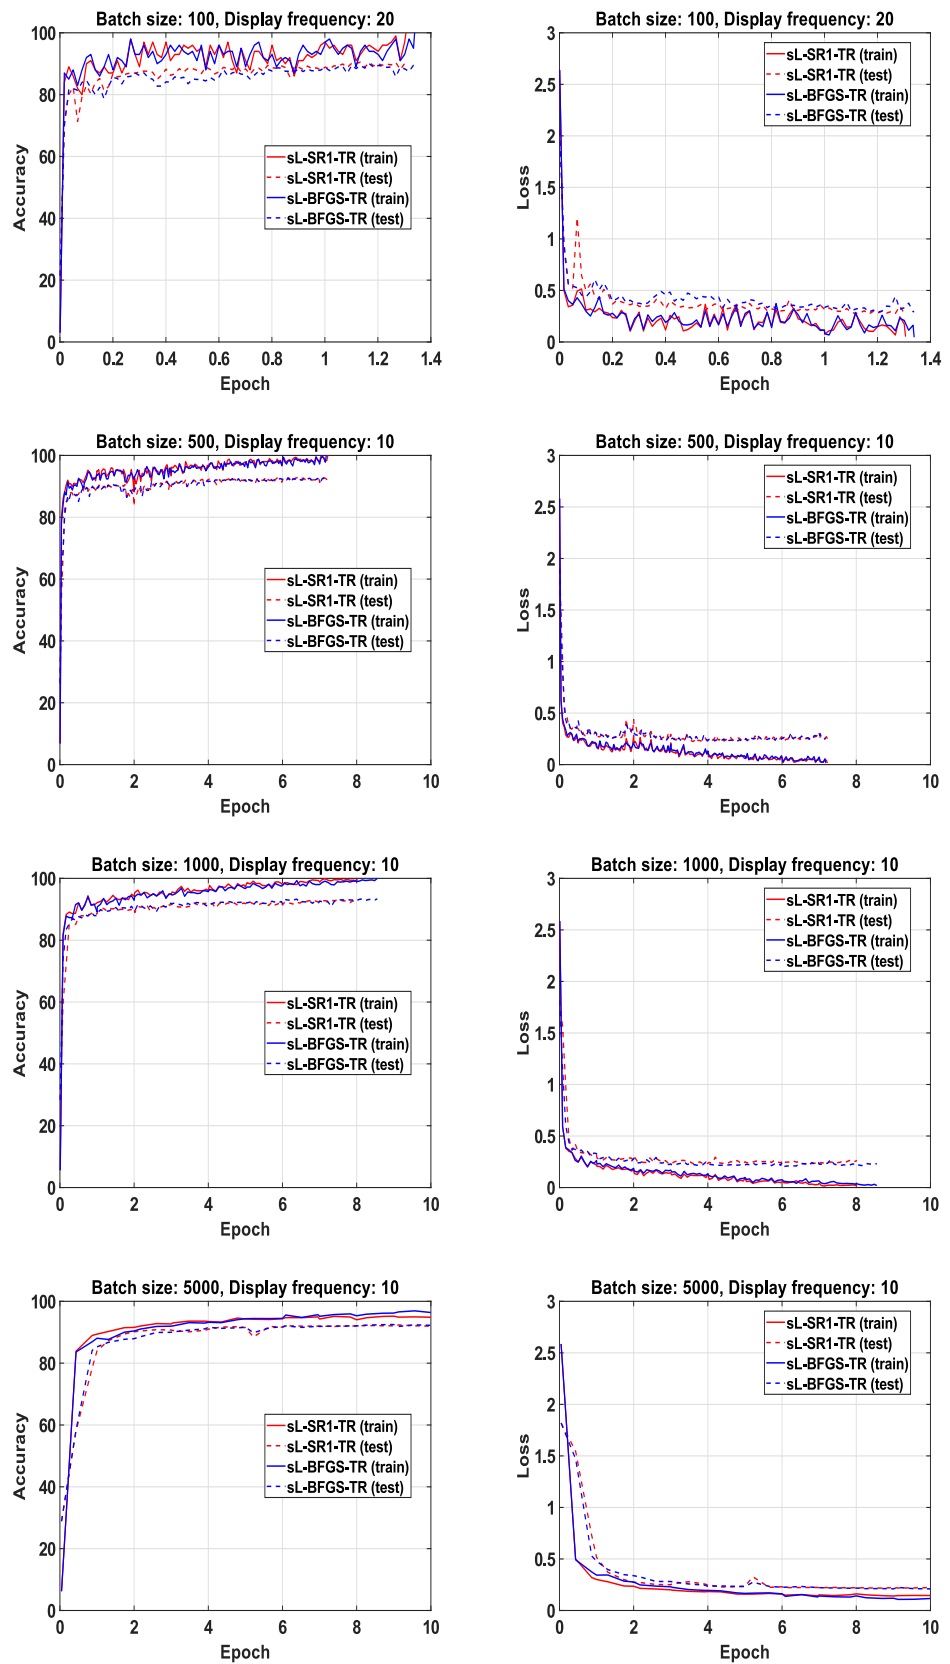

Figure S8. F-MNIST, ConvNet3FC2: The accuracy and loss evolution vs epoch.

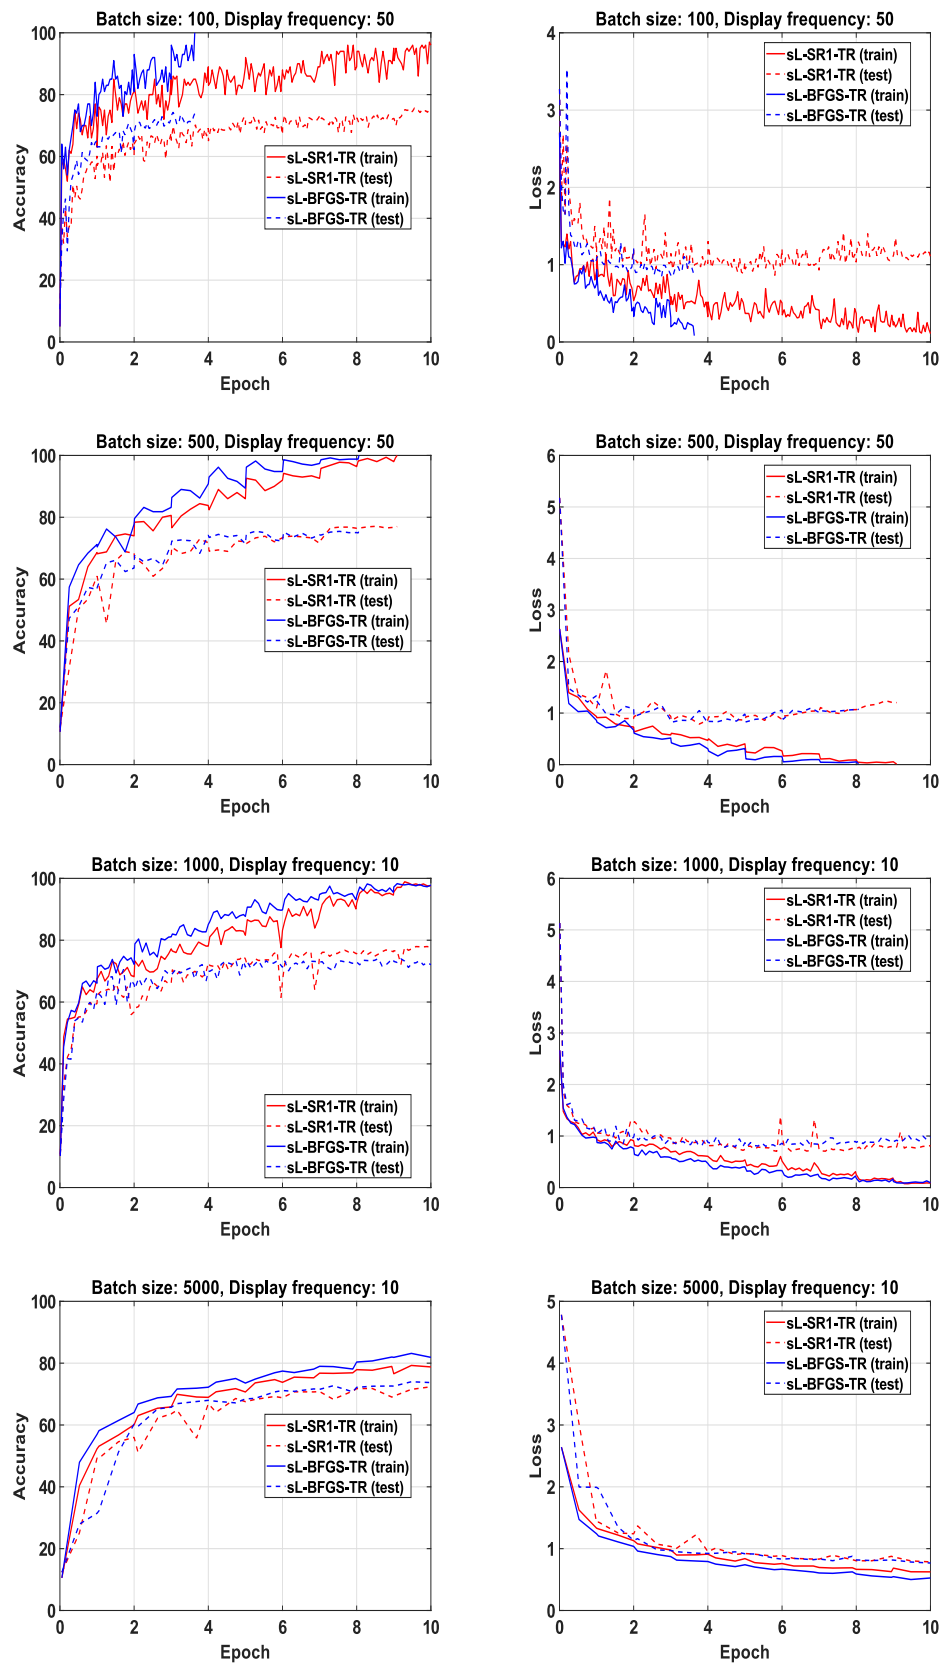

Figure S9. CIFAR10, ConvNet3FC2: The accuracy and loss evolution vs epoch.

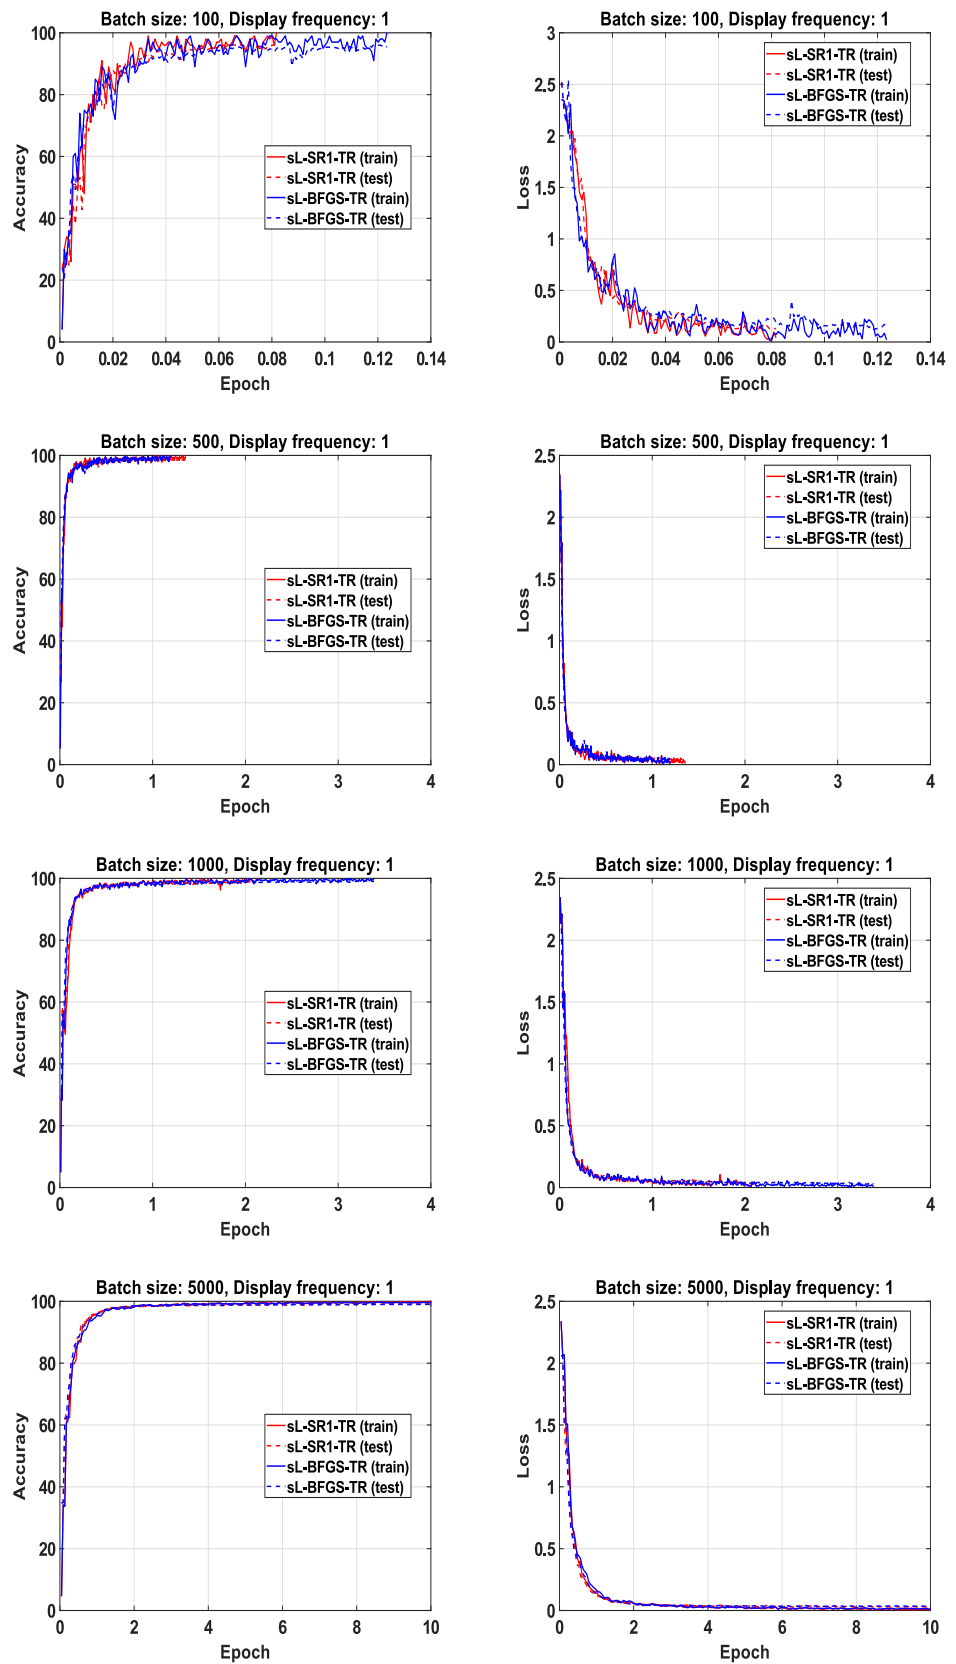

Figure S10. MNIST, ConvNet3FC2 (No BN): The accuracy and loss evolution vs epoch.

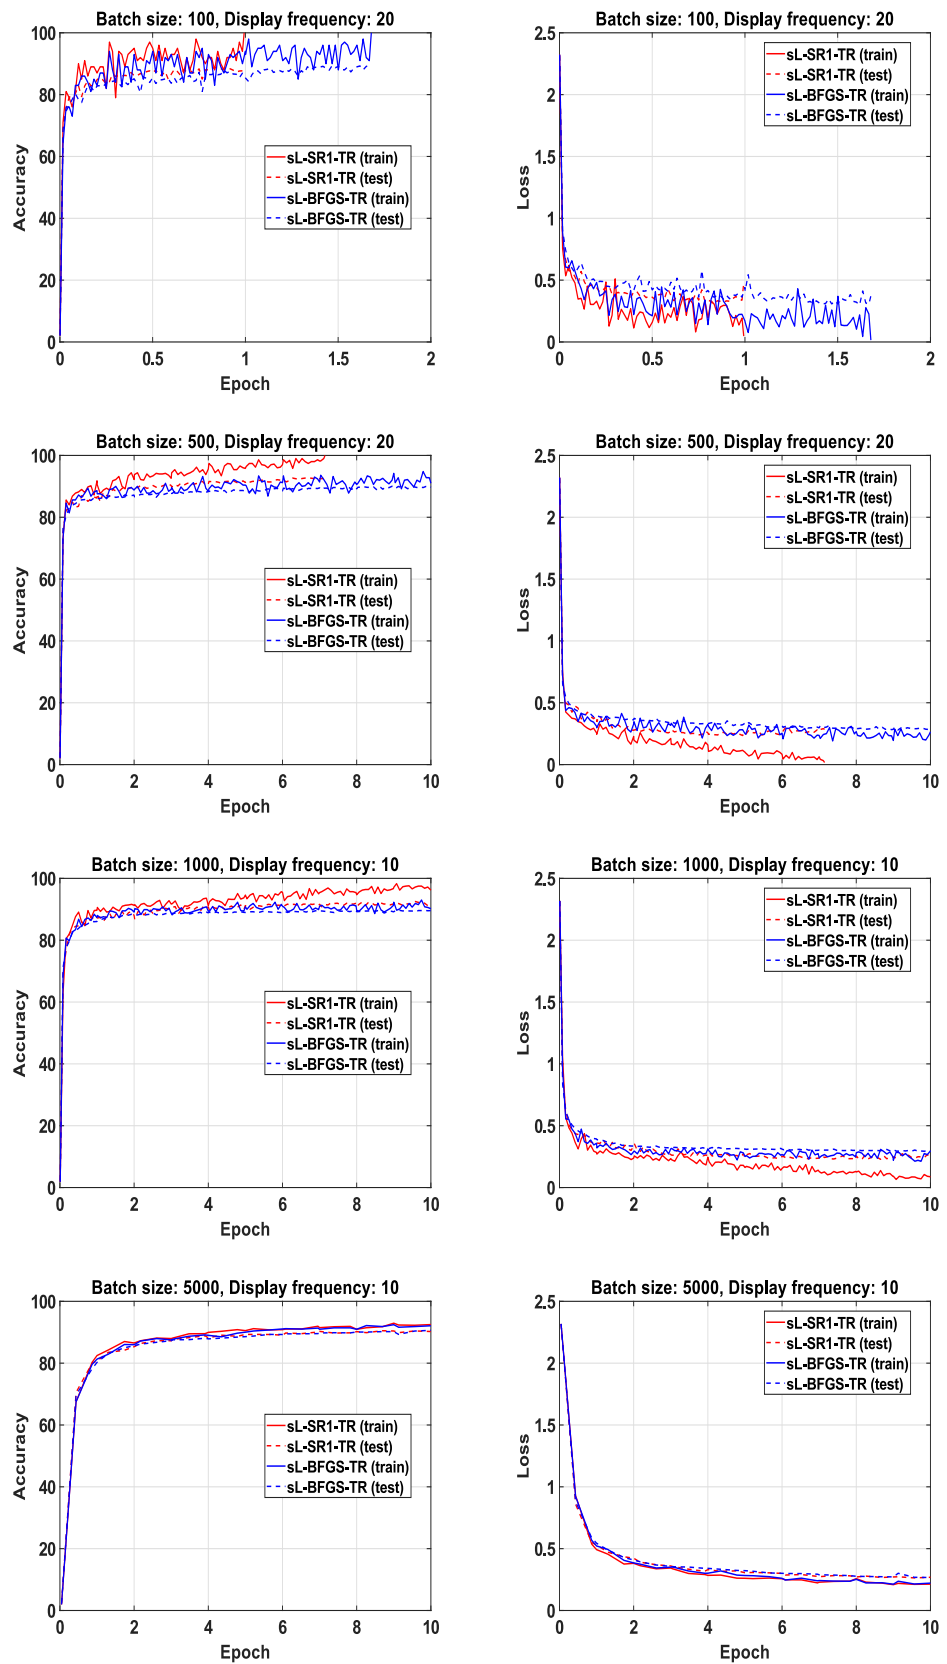

Figure S11. F-MNIST, ConvNet3FC2 (No BN): The accuracy and loss evolution vs epoch.

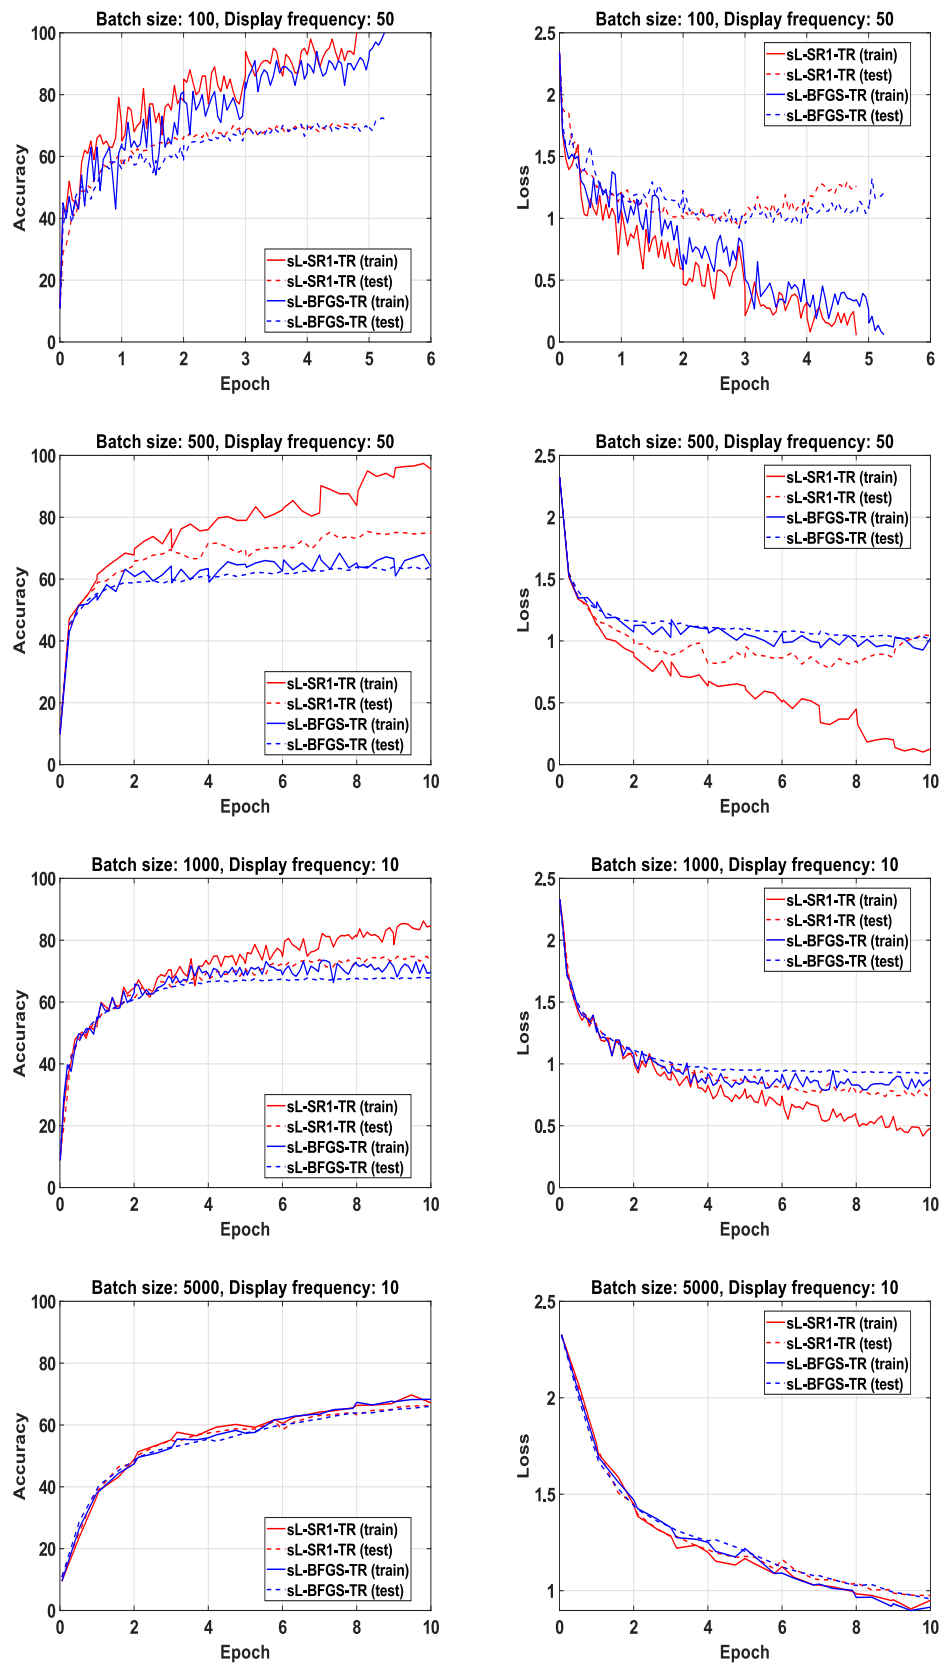

Figure S12. CIFAR10, ConvNet3FC2 (No BN): The accuracy and loss evolution vs epoch.



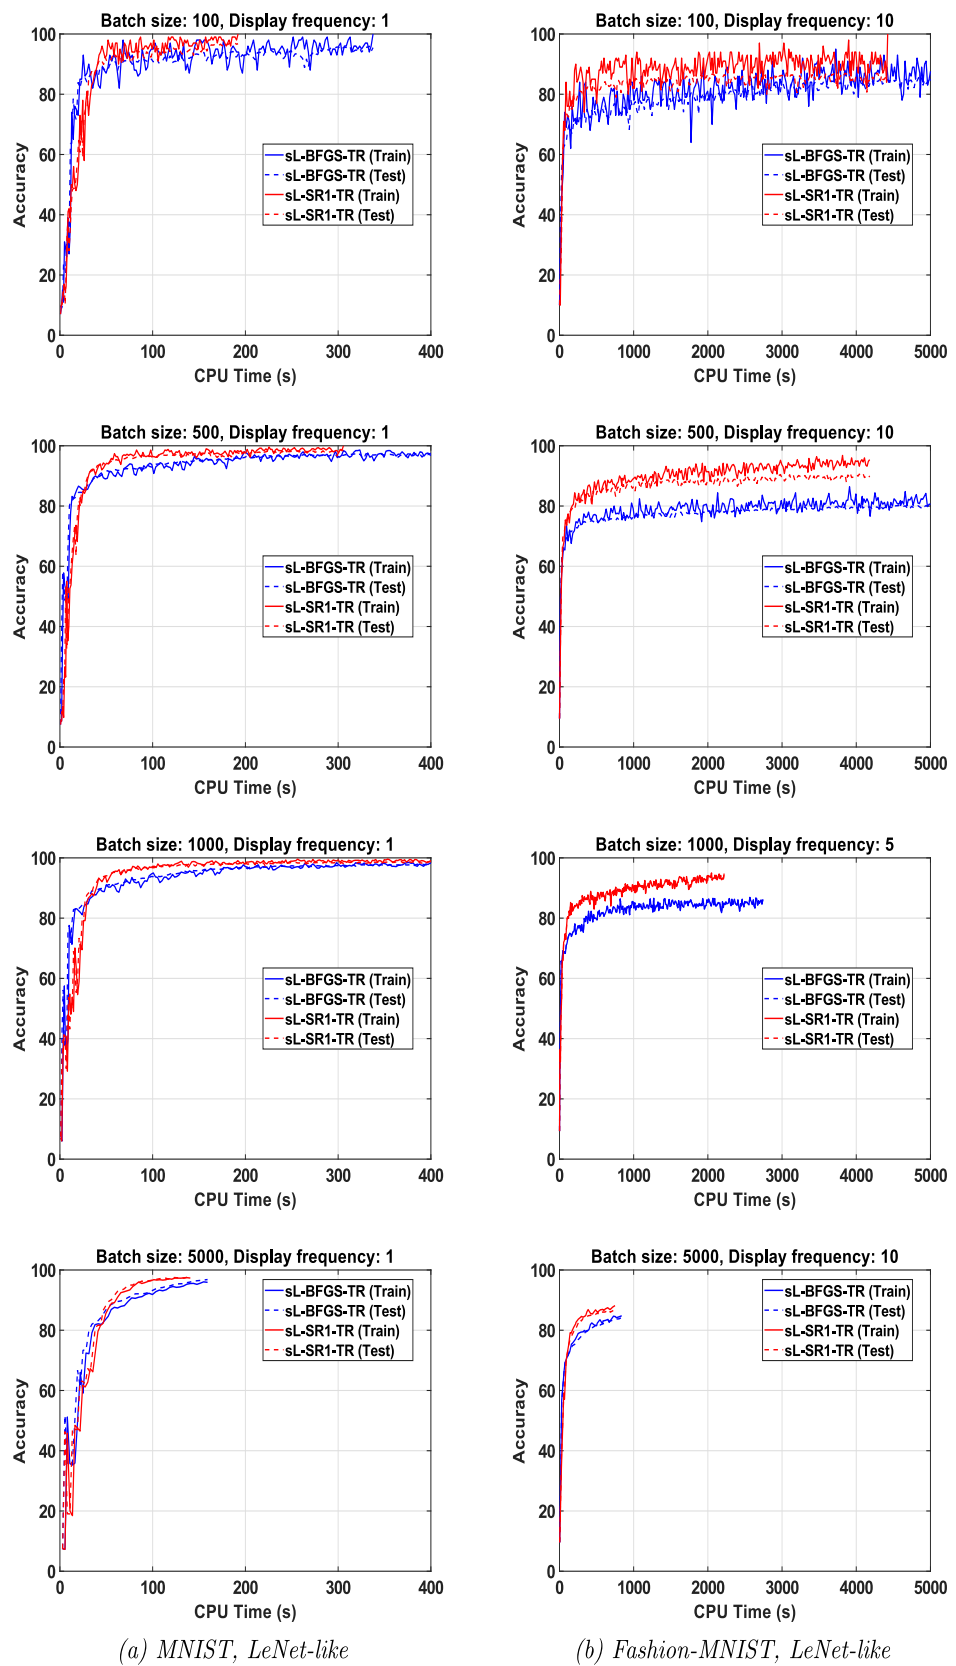

Figure S13. MNIST and F-MNIST: The accuracy evolution vs CPU time.

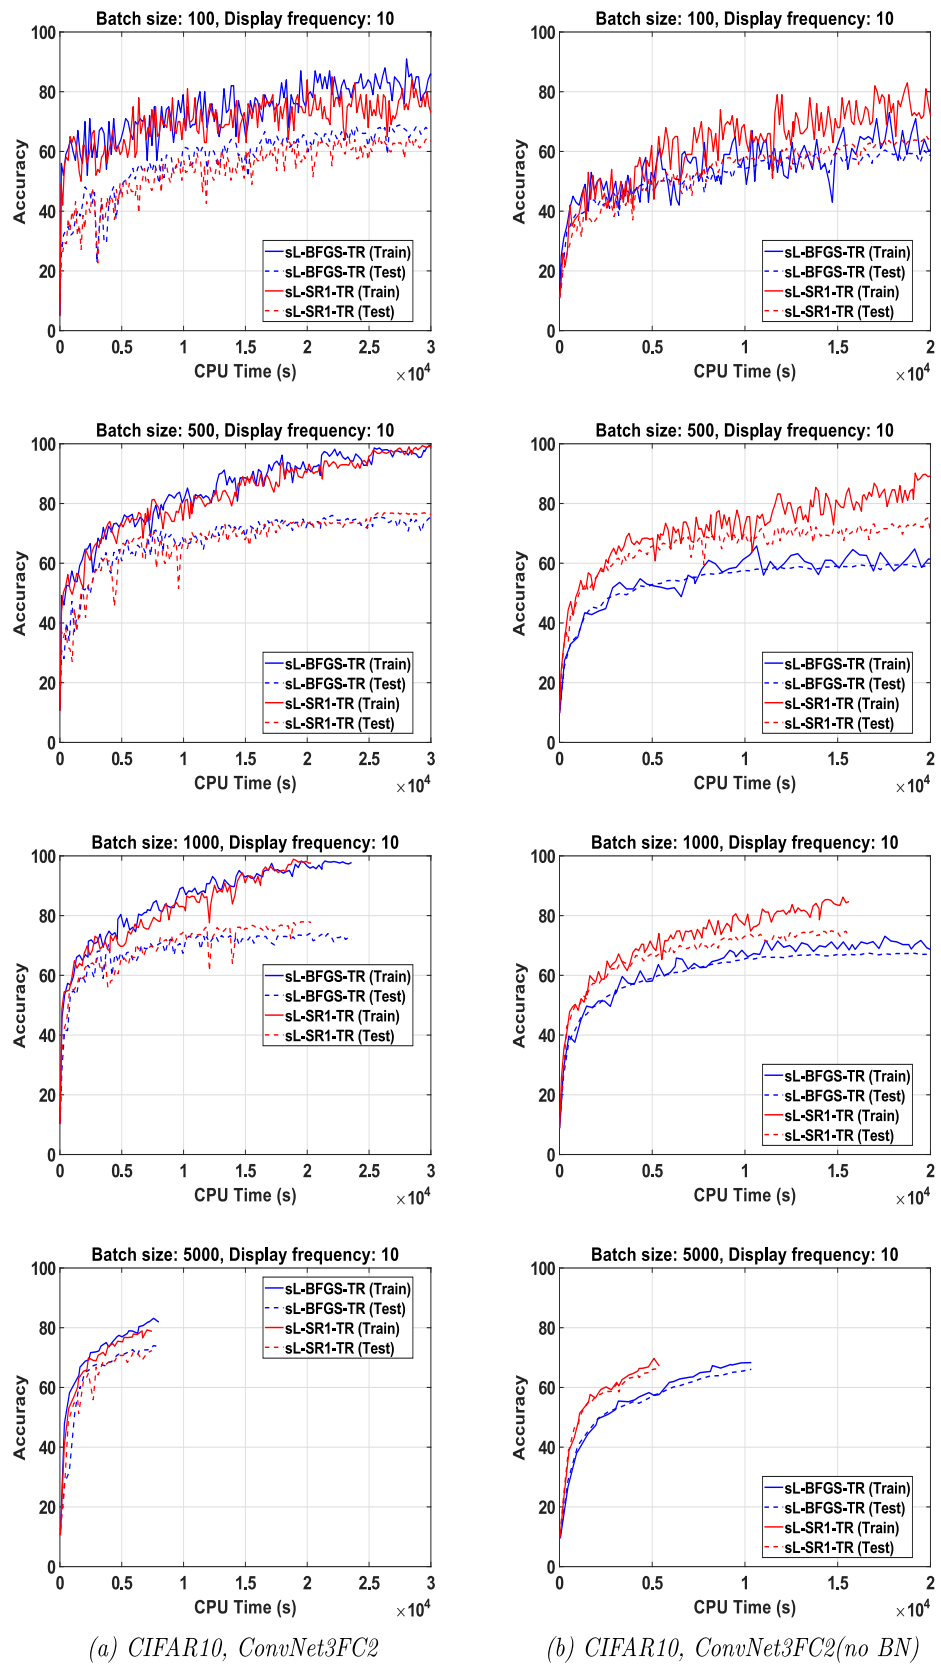

Figure S14. CIFAR10: The accuracy evolution vs CPU time.

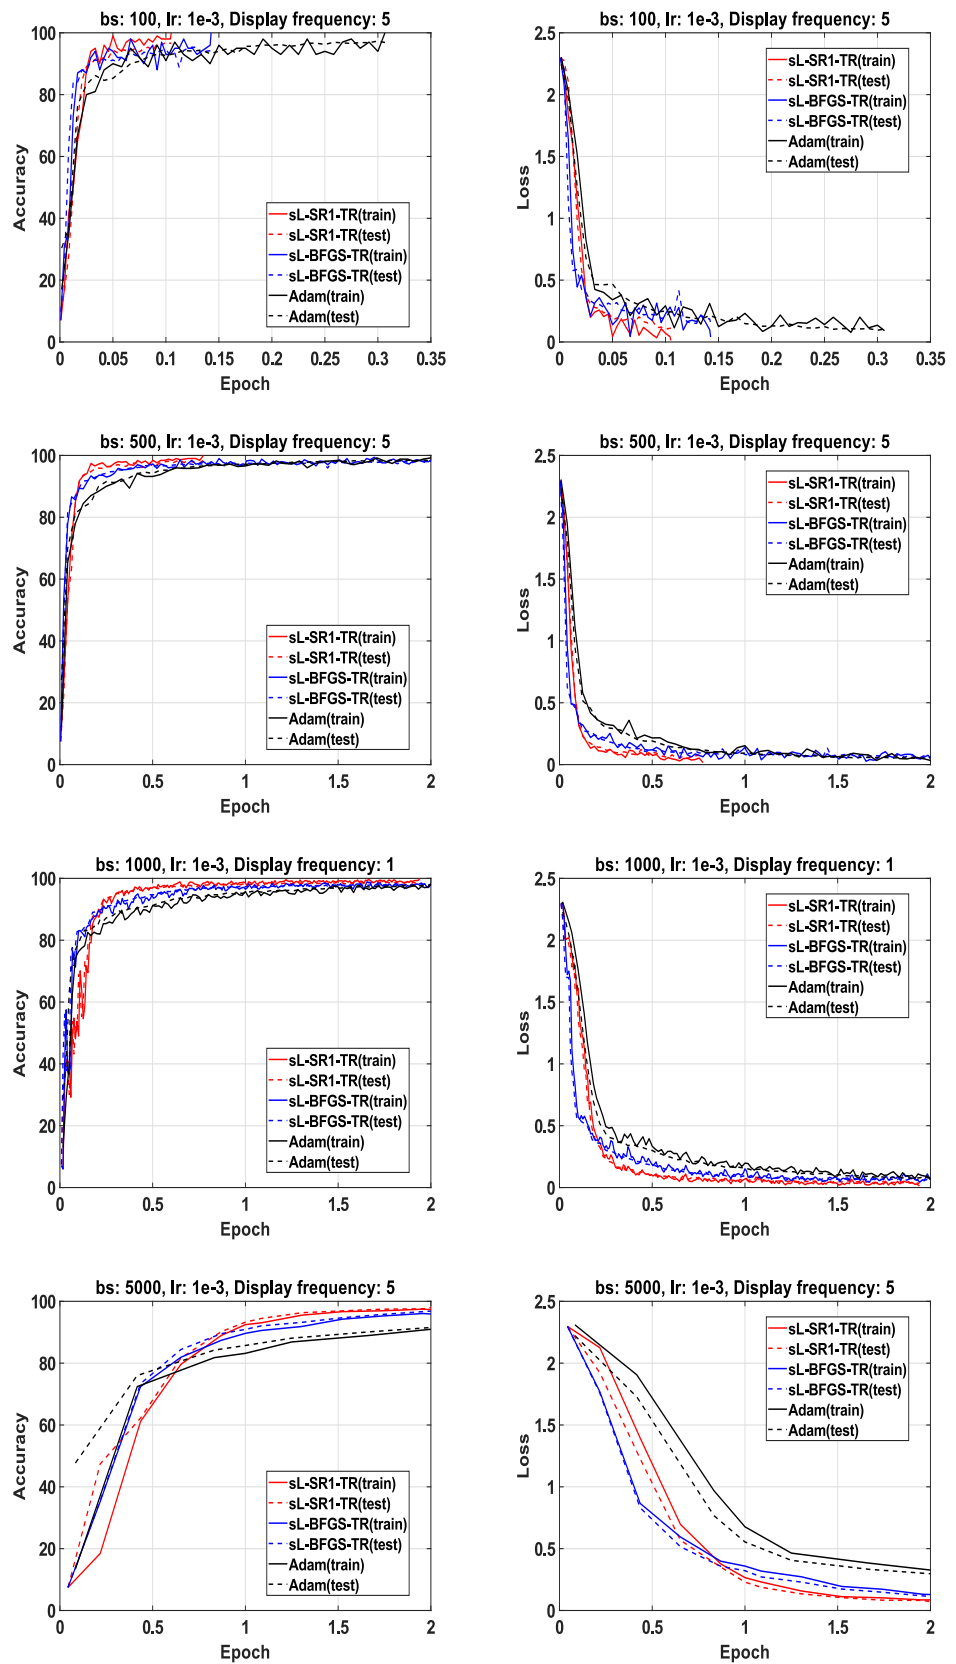Figure S15. MNIST, LeNet-like: Comparison with *tuned* Adam.

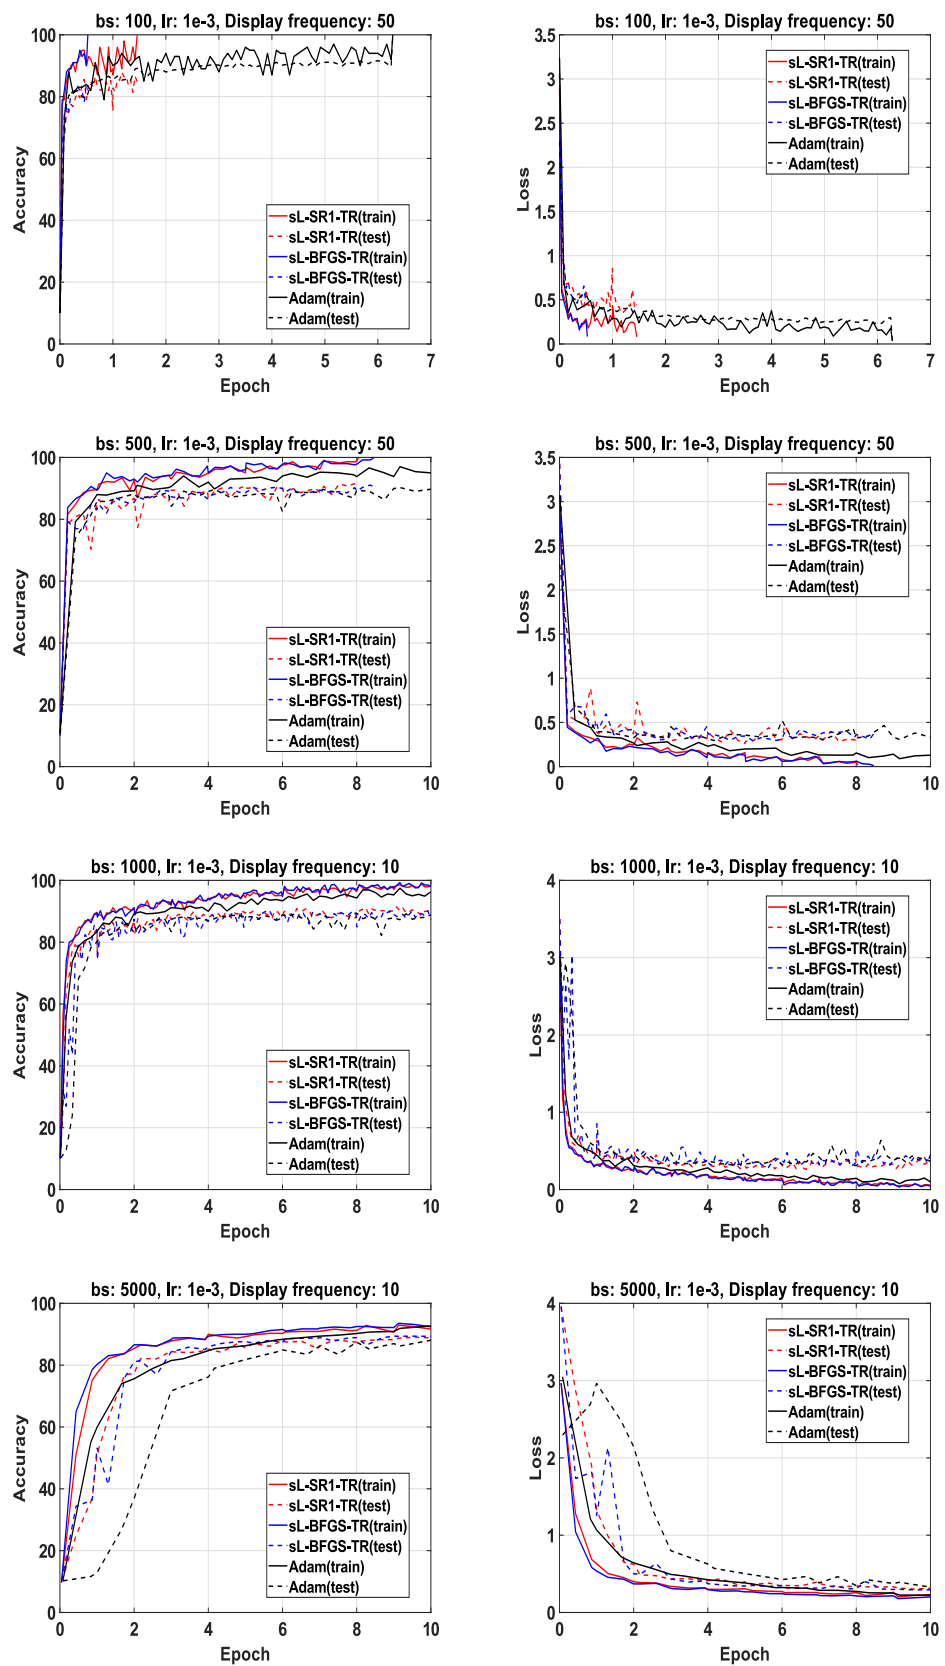Figure S16. F-MNIST, ResNet-20: Comparison with *tuned* Adam.

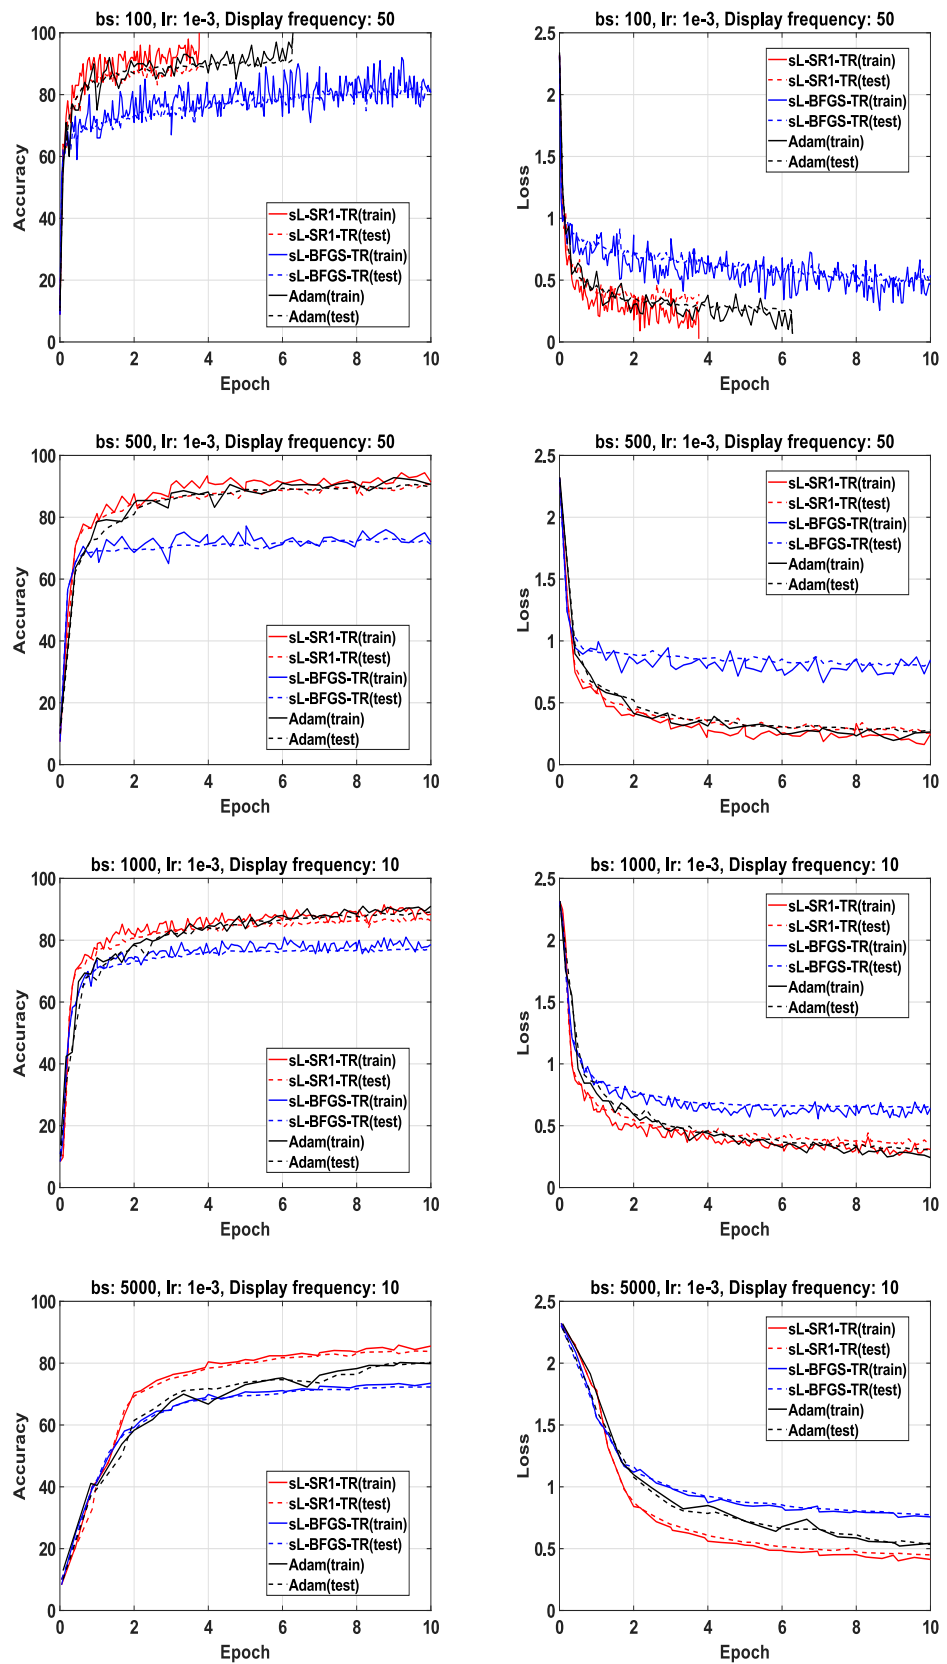Figure S17. F-MNIST, ResNet-20 (No BN): ResNet-20: Comparison with *tuned* Adam.

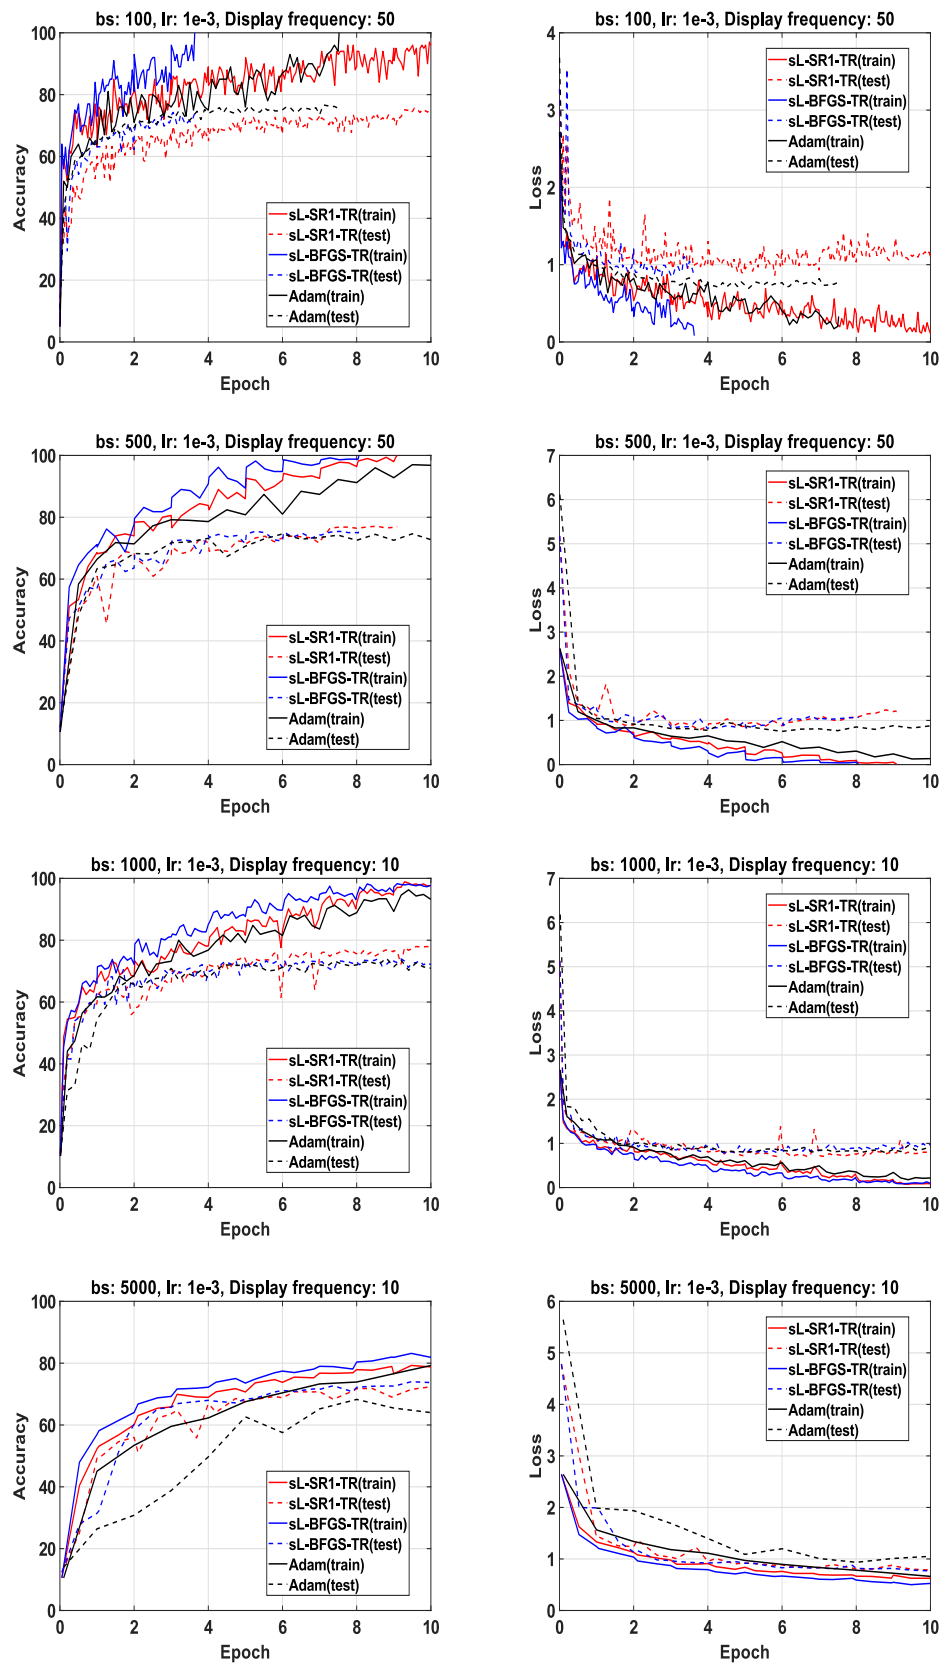Figure S18. CIFAR10, ConvNet3FC2: Comparison with *tuned* Adam.

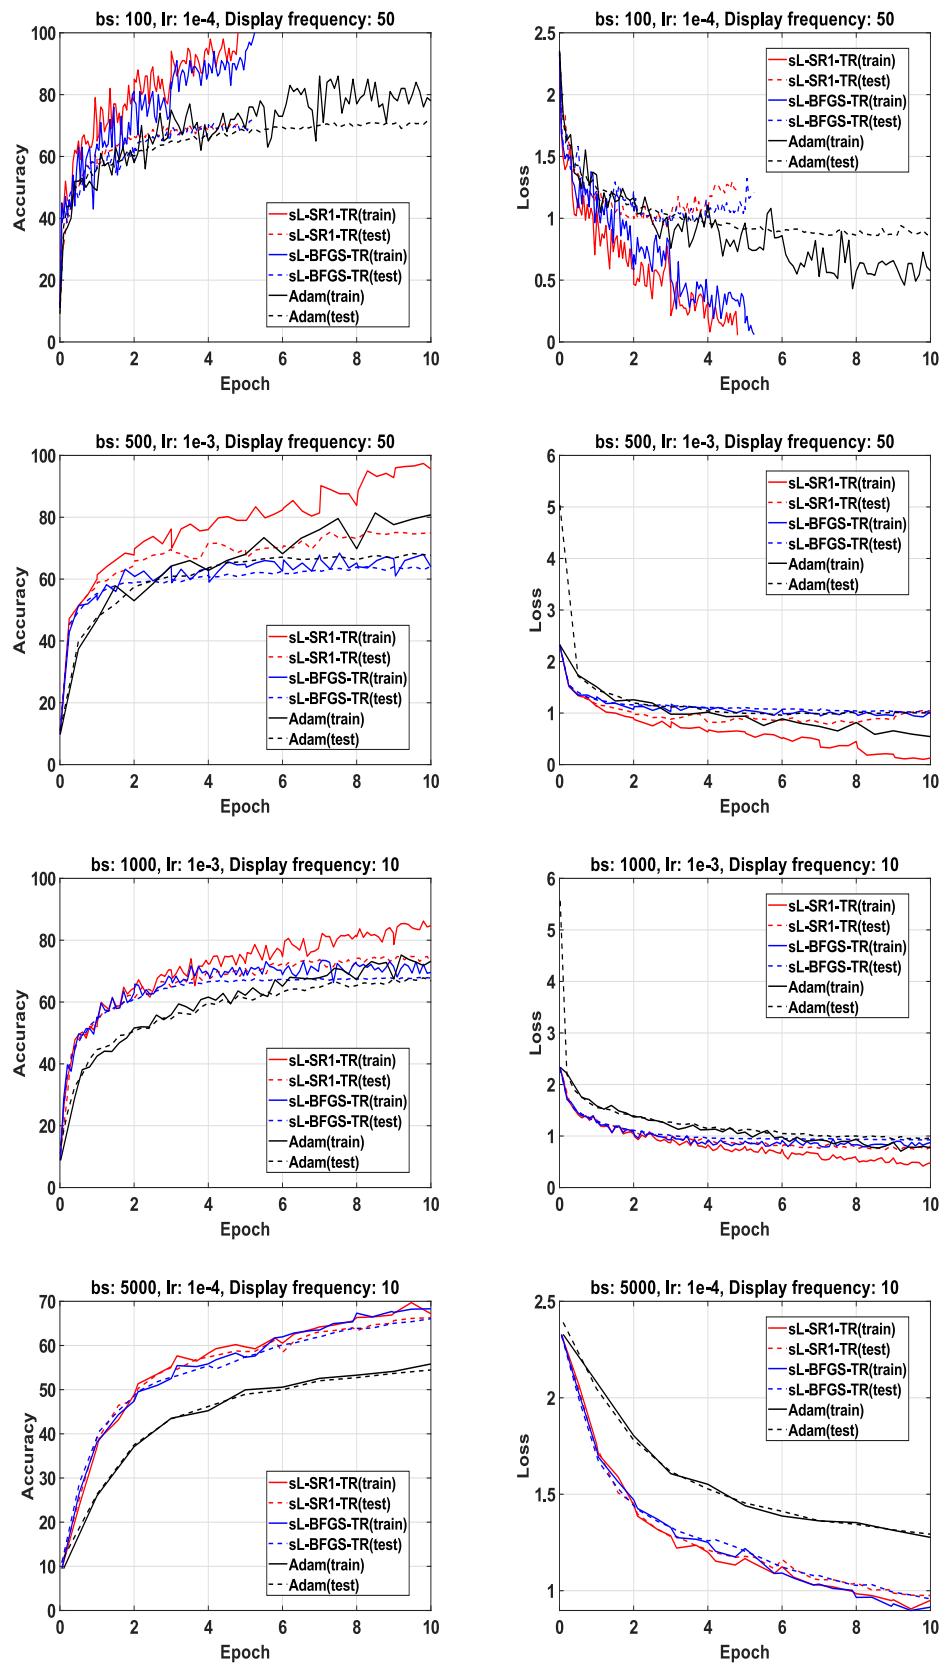Figure S19. CIFAR10, ConvNet3FC2 (No BN): Comparison with *tuned* Adam.
